# Supplementary material for: Pre-pregnancy weight, gestational weight gain, and the gut microbiota of mothers and their infants
Source: PubMed Central journal article supplement (PMC5584478; doi:10.1186/s40168-017-0332-0), 2017-09-04
Supplement: 40168_2017_332_MOESM1_ESM.pdf [file 40168_2017_332_MOESM1_ESM.pdf]

## Legends

### Supplemental Tables

Table S1. Demographic and birth characteristics of mothers in NoMIC with non-missing pre-pregnancy BMI information by inclusion in the study sample (i.e. with viable gut microbiota samples).

Table S2. Institute of Medicine's recommended range of adequate gestational weight gain based on pre-pregnancy BMI; weight gain less than the recommended range was considered "low" and greater was considered "excessive."

Table S3. Demographic and birth characteristics of mothers by GWG group: excessive and non-excessive GWG

Table S4. Results of Beta-Binomial Models for the most important OTUs from random forests (RF) to classify women based on pre-pregnancy weight group. Taxonomy indicates the green genes taxonomy. Adjusted p-values account for the following maternal characteristics: maternal age, maternal education, Norwegian ethnicity, twins, maternal smoking, and parity.

Table S5. Results of Beta-Binomial Models for most important genera from random forests (RF) to classify women based on pre-pregnancy weight group. Adjusted p-values account for the following maternal characteristics: maternal age, maternal education, Norwegian ethnicity, twins, maternal smoking, and parity.

Table S6. Results of Beta-Binomial Models for the most important OTUs from random forests (RF) to classify women based on GWG group. Taxonomy indicates the green genes taxonomy. Adjusted p-values account for the following maternal characteristics: maternal age, maternal education, Norwegian ethnicity, maternal smoking, and parity.

Table S7. Results of Beta-Binomial Models for the most important genera from random forests (RF) to classify women based on GWG group. Adjusted p-values account for the following maternal characteristics: maternal age, maternal education, Norwegian ethnicity, maternal smoking, and parity.

Table S8. Association between exposure to Maternal OW/OB and 3 measures of infant alpha diversity during the first two years of life, both unadjusted and adjusted for exclusive breastfeeding, mode of delivery at birth, antibiotic exposure, and gestational age at birth. Results are estimates from longitudinal hierarchical linear regression models.

Table S9. Results of random forest selection process to identify infant gut microbiota taxa associated with exposure to maternal OW/OB, sorted from most to least important according to the Mean Decrease in Accuracy. The out of bag error was 32.9%. For a similar random forest classifying randomly assigned exposure status, the out of bag error was only 21.6% better, indicating that the model failed to identify significant taxonomic differences with exposure.

Table S10. Results of random forest selection process to identify infant gut microbiota taxa associated with exposure to excessive GWG, sorted from most to least important according to the Mean Decrease in Accuracy. The out of bag error was 36%. For a similar random forest classifying randomly assigned exposure status, the out of bag error was only 8% better, indicating that the model failed to identify significant taxonomic differences with exposure.

### Supplemental Figures

Figure S1. Flow chart for the samples from the NoMIC cohort included in this study.

Figure S2. Most abundant a) phylum and b) genus level taxa in maternal samples at the time of delivery and infant samples at days 4, 10, 30, 120, 365, and 730 post-birth by maternal pre-pregnancy overweight / obese (OW/OB) status.

Figure S3. Principal coordinate analysis plots of weighted (left) and unweighted (right) UniFrac distance of maternal gut microbiota samples 4 days post-partum and infant gut samples at days 4, 10, 30, 120, 365, and 730 post-birth by a) sampling time, b) maternal overweight / obesity (OW/OB) and c) maternal excessive gestational weight gain (GWG).

## Supplemental Tables

Table S1. Demographic and birth characteristics of mothers in NoMIC with non-missing pre-pregnancy BMI information by inclusion in the study sample (i.e. with viable gut microbiota samples).

| Variable                                   | Total (N=169)    | Not in Study Sample | In Study Sample  | P-Value |
|--------------------------------------------|------------------|---------------------|------------------|---------|
|                                            |                  | (N=309)             | (N=169)          |         |
| N (%) or Median (IQR)                      |                  |                     |                  |         |
| BMI                                        | 23.9 (21.3-27.1) | 24.7 (21.5-27.7)    | 23.1 (21.1-25.5) | 0.01    |
| Pre-pregnancy BMI category                 |                  |                     |                  |         |
| Underweight                                | 24 (5.0%)        | 17 (5.5%)           | 7 (4.1%)         | 0.01    |
| Normal                                     | 261 (54.6%)      | 151 (48.9%)         | 110 (65.1%)      |         |
| Overweight                                 | 128 (26.8%)      | 96 (31.1%)          | 32 (18.9%)       |         |
| Obese                                      | 65 (13.6%)       | 45 (14.6%)          | 20 (11.8%)       |         |
| Ethnic Norwegian                           | 388 (88.0%)      | 247 (88.5%)         | 141 (87.0%)      | 0.64    |
| Maternal Education                         |                  |                     |                  |         |
| <12yrs education                           | 56 (12.1%)       | 47 (15.6%)          | 9 (5.6%)         | 0.01    |
| 12yrs education                            | 83 (18.0%)       | 55 (18.2%)          | 28 (17.5%)       |         |
| >12yrs education                           | 323 (69.9%)      | 200 (66.2%)         | 123 (76.9%)      |         |
| Maternal Age (years)                       | 30.0 (27.0-33.0) | 30.0 (27.0-33.0)    | 30.0 (27.0-34.0) | 0.35    |
| Parity                                     |                  |                     |                  |         |
| No prior pregnancies                       | 207 (43.3%)      | 124 (40.1%)         | 83 (49.1%)       | 0.16    |
| 1 prior child                              | 171 (35.8%)      | 118 (38.2%)         | 53 (31.4%)       |         |
| >1 prior child.                            | 100 (20.9%)      | 67 (21.7%)          | 33 (19.5%)       |         |
| Twins                                      | 33 (6.9%)        | 22 (7.1%)           | 11 (6.5%)        | 0.80    |
| Maternal Smoking at Beginning of Pregnancy |                  |                     |                  |         |
| Never smoker                               | 275 (58.4%)      | 163 (53.6%)         | 112 (67.1%)      | <0.001  |
| Past smoker                                | 128 (27.2%)      | 88 (28.9%)          | 40 (24.0%)       |         |
| Occasional                                 | 17 (3.6%)        | 10 (3.3%)           | 7 (4.2%)         |         |
| Daily smoker <=10                          | 44 (9.3%)        | 40 (13.2%)          | 4 (2.4%)         |         |
| Daily smoker >10                           | 7 (1.5%)         | 3 (1.0%)            | 4 (2.4%)         |         |
| Diabetes                                   |                  |                     |                  |         |
| No Diabetes                                | 467 (97.7%)      | 300 (97.1%)         | 167 (98.8%)      | 0.20    |
| T1                                         | 7 (1.5%)         | 6 (1.9%)            | 1 (0.6%)         |         |
| T2                                         | 1 (0.2%)         | 0 (0.0%)            | 1 (0.6%)         |         |
| Pregnancy diabetes                         | 3 (0.6%)         | 3 (1.0%)            | 0 (0.0%)         |         |
| Glucose in urine                           | 53 (11.1%)       | 38 (12.3%)          | 15 (8.9%)        | 0.25    |
| High BP                                    | 27 (5.6%)        | 19 (6.1%)           | 8 (4.7%)         | 0.52    |
| Gestational Weight Gain (kg)               | 14 (10.1-18)     | 14 (10.1-19)        | 14 (10.2-18)     | 0.91    |
| GWG relative to IOM recommendations        |                  |                     |                  |         |
| Low                                        | 46 (13.2%)       | 30 (13.2%)          | 16 (13.3%)       | 0.43    |
| Adequate                                   | 107 (30.7%)      | 65 (28.5%)          | 42 (35.0%)       |         |
| Excessive                                  | 195 (56.0%)      | 133 (58.3%)         | 62 (51.7%)       |         |
| Gestational Age (days)                     | 278 (254-286)    | 278 (254-286)       | 278 (254-285)    | 0.65    |
| Birth Weight (kg)                          | 3.4 (2.7-3.8)    | 3.3 (2.8-3.9)       | 3.4 (2.5-3.8)    | 0.17    |
| C-section                                  | 158 (33.1%)      | 108 (35.0%)         | 50 (29.6%)       | 0.23    |
| Maternal Antibiotics                       | 159 (36.3%)      | 107 (38.6%)         | 52 (32.3%)       | 0.18    |
| Day of Birth                               | 25 (5.7%)        | 16 (5.8%)           | 9 (5.6%)         | 0.94    |
| Day before Birth                           | 8 (1.8%)         | 6 (2.2%)            | 2 (1.2%)         | 0.72    |
| Week before Birth                          | 18 (4.1%)        | 12 (4.3%)           | 6 (3.7%)         | 0.76    |
| Month before Birth                         | 25 (5.7%)        | 16 (5.8%)           | 9 (5.6%)         | 0.94    |
| >1 Month before Birth                      | 92 (21.0%)       | 66 (23.8%)          | 26 (16.1%)       | 0.06    |
| Antibiotics given to newborn               | 52 (11.6%)       | 38 (13.3%)          | 14 (8.6%)        | 0.13    |

Table S2. Institute of Medicine's recommended range of adequate gestational weight gain based on pre-pregnancy BMI; weight gain less than the recommended range was considered "low" and greater was considered "excessive."

| <b>Prepregnancy BMI</b> | <b>BMI (kg/m<sup>2</sup>)</b> | <b>Recommended Weight Gain (lbs / kg)</b> |
|-------------------------|-------------------------------|-------------------------------------------|
| Underweight             | <18.5                         | 28–40 lbs / 13-18 kg                      |
| Normal weight           | 18.5-24.9                     | 25–35 / 11.5-16 kg                        |
| Overweight              | 25.0-29.9                     | 15–25 lbs / 7-11.5 kg                     |
| Obese                   | ≥30.0                         | 11–20 / 5-9 kg                            |

Table S3. Demographic and Birth Characteristics of Mothers by GWG Group: Excessive and Non-excessive GWG

| Variable                                   | Total (N=116)       | Non-Excessive GWG Excessive GWG |                     | P-Value |
|--------------------------------------------|---------------------|---------------------------------|---------------------|---------|
|                                            |                     | (N=53)                          | (N=63)              |         |
| N (%) or Median (IQR)                      |                     |                                 |                     |         |
| BMI                                        | 22.9 (21.2-25.3)    | 22.5 (21.1-25.1)                | 23.1 (21.2-25.4)    | 0.84    |
| Pre-pregnancy BMI category                 |                     |                                 |                     |         |
| Underweight                                | 5 (4.3%)            | 4 (7.5%)                        | 1 (1.6%)            | <.001   |
| Normal                                     | 77 (66.4%)          | 35 (66.0%)                      | 42 (66.7%)          |         |
| Overweight                                 | 25 (21.6%)          | 8 (15.1%)                       | 17 (27.0%)          |         |
| Obese                                      | 9 (7.8%)            | 6 (11.3%)                       | 3 (4.8%)            |         |
| Overweight / Obese                         | 34 (29.3%)          | 14 (26.4%)                      | 20 (31.7%)          | 0.53    |
| Ethnic Norwegian                           | 96 (84.2%)          | 47 (88.7%)                      | 49 (80.3%)          | 0.30    |
| Maternal Education                         |                     |                                 |                     |         |
| <12yrs education                           | 4 (3.6%)            | 2 (3.9%)                        | 2 (3.3%)            | 0.06    |
| 12yrs education                            | 16 (14.4%)          | 6 (11.8%)                       | 10 (16.7%)          |         |
| >12yrs education                           | 91 (82.0%)          | 43 (84.3%)                      | 48 (80.0%)          |         |
| Maternal Age (years)                       | 31.0 (28.0-34.0)    | 31.0 (28.0-35.0)                | 30.0 (27.0-33.0)    | 0.28    |
| Parity                                     |                     |                                 |                     |         |
| No prior pregnancies                       | 53 (45.7%)          | 19 (35.8%)                      | 34 (54.0%)          | 0.12    |
| 1 prior child                              | 41 (35.3%)          | 21 (39.6%)                      | 20 (31.7%)          |         |
| >1 prior child.                            | 22 (19.0%)          | 13 (24.5%)                      | 9 (14.3%)           |         |
| Twins                                      | 11 (6.5%)           | 8 (6.8%)                        | 3 (5.8%)            | 1       |
| Maternal Smoking at Beginning of Pregnancy |                     |                                 |                     |         |
| Never smoker                               | 82 (71.3%)          | 38 (71.7%)                      | 44 (71.0%)          | 0.02    |
| Past smoker                                | 25 (21.7%)          | 12 (22.6%)                      | 13 (21.0%)          |         |
| Occasional                                 | 5 (4.3%)            | 2 (3.8%)                        | 3 (4.8%)            |         |
| Daily smoker <=10                          | 3 (2.6%)            | 1 (1.9%)                        | 2 (3.2%)            |         |
| Diabetes                                   |                     |                                 |                     |         |
| No Diabetes                                | 115 (99.1%)         | 53 (100.0%)                     | 62 (98.4%)          | 1       |
| T1                                         | 1 (0.9%)            | 0 (0.0%)                        | 1 (1.6%)            |         |
| Glucose in urine                           | 15 (8.9%)           | 8 (6.8%)                        | 7 (13.5%)           | 0.16    |
| High BP                                    | 9 (7.8%)            | 3 (5.7%)                        | 6 (9.5%)            | 0.51    |
| Gestational Weight Gain (kg)               | 15.0 (12.0-18.9)    | 11.7 (8.0-14.0)                 | 18.0 (17.0-22.0)    | <.001   |
| Gestational Age (days)                     | 284.0 (277.0-287.5) | 282.0 (275.0-286.0)             | 284.0 (277.0-288.0) | 0.21    |
| Birth Weight (kg)                          | 3.58 (3.31-3.87)    | 3.44 (3.23-3.69)                | 3.74 (3.38-4.0)     | 0.003   |
| C-section                                  | 24 (20.7%)          | 9 (17.0%)                       | 15 (23.8%)          | 0.37    |
| Maternal Antibiotics                       | 31 (27.2%)          | 14 (26.4%)                      | 17 (27.9%)          | 1       |
| Day of Birth                               | 3 (2.6%)            | 1 (1.9%)                        | 2 (3.3%)            | 1       |
| Day before Birth                           | 1 (0.9%)            | 0 (0.0%)                        | 1 (1.6%)            | 1       |
| Week before Birth                          | 3 (2.6%)            | 1 (1.9%)                        | 2 (3.3%)            | 1.00    |
| Month before Birth                         | 7 (6.1%)            | 1 (1.9%)                        | 6 (9.8%)            | 0.12    |
| >Month before Birth                        | 18 (15.8%)          | 11 (20.8%)                      | 7 (11.5%)           | 0.2     |
| Antibiotics given to newborn               | 5 (4.4%)            | 0 (0.0%)                        | 5 (8.2%)            | 0.06    |
| Alpha Diversity                            |                     |                                 |                     |         |
| Shannon                                    | 5.8 (5.3-6.1)       | 5.8 (5.2-6.2)                   | 5.7 (5.3-6.1)       | 0.54    |
| N Observed Species                         | 371.0 (311.5-403.0) | 373.0 (309.0-412.0)             | 369.0 (312.0-393.0) | 0.82    |
| PD Whole Tree                              | 28.0 (23.8-30.8)    | 28.2 (23.8-31.0)                | 27.6 (23.6-30.6)    | 0.99    |

Table S4. Results of Beta-Binomial Models for the most important OTUs from random forests (RF) to classify women based on pre-pregnancy weight group. Taxonomy indicates the green genes taxonomy. Adjusted p-values account for the following maternal characteristics: maternal age, maternal education, Norwegian ethnicity, twins, maternal smoking, and parity.

| OTUID  | Taxonomy                                                                                                         | Excess GWG vs Non |         | Adjusted RF |       |    |
|--------|------------------------------------------------------------------------------------------------------------------|-------------------|---------|-------------|-------|----|
|        |                                                                                                                  | Estimate          | P-value | P-value     | Rank  |    |
| 198636 | p_Firmicutes; c_Clostridia; o_Clostridiales; f_Lachnospiraceae; g_Blautia; s_                                    | ↑                 | 0.366   | 0.012       | 0.007 | 10 |
| 505670 | p_Firmicutes; c_Clostridia; o_Clostridiales; f_[Tissierellaceae]; g_WAL_1855D; s_                                | ↑                 | 1.880   | 0.014       | 0.007 | 5  |
| 199575 | p_Firmicutes; c_Clostridia; o_Clostridiales; f_Lachnospiraceae; g_Blautia; s_                                    | ↑                 | 0.429   | 0.040       | 0.019 | 6  |
| 152450 | k_Archaea; p_Euryarchaeota; c_Methanobacteria; o_Methanobacteriales; f_Methanobacteriaceae; g_Methanobrevibacter | ↑                 | 0.555   | 0.058       | 0.072 | 7  |
| 185420 | p_Bacteroidetes; c_Bacteroidia; o_Bacteroidales; f_Bacteroidaceae; g_Bacteroides; s_                             | ↓                 | -0.467  | 0.090       | 0.056 | 4  |
| 359314 | p_Firmicutes; c_Clostridia; o_Clostridiales; f_Ruminococcaceae; g_Faecalibacterium; s_prausnitzii                | ↑                 | 0.317   | 0.106       | 0.086 | 3  |
| 354334 | p_Firmicutes; c_Clostridia; o_Clostridiales; f_Ruminococcaceae; g_;                                              | ↑                 | 0.198   | 0.230       | 0.128 | 1  |
| 316496 | p_Firmicutes; c_Clostridia; o_Clostridiales; f_Clostridiaceae; g_SMB53; s_                                       | ↑                 | 0.094   | 0.601       | 0.346 | 9  |
| 352347 | p_Firmicutes; c_Clostridia; o_Clostridiales; f_Ruminococcaceae; g_;                                              | ↑                 | 0.072   | 0.657       | 0.545 | 2  |
| 365385 | p_Actinobacteria; c_Actinobacteria; o_Bifidobacteriales; f_Bifidobacteriaceae; g_Bifidobacterium; s_b            | ↑                 | 0.041   | 0.872       | 0.788 | 8  |

Table S52. Results of Beta-Binomial Models for most important genera from random forests (RF) to classify women based on pre-pregnancy weight group. Adjusted p-values account for the following maternal characteristics: maternal age, maternal education, Norwegian ethnicity, twins, maternal smoking, and parity.

| Taxonomy                                                                                         | OW/OB vs Non |         | Adjusted RF |       |   |
|--------------------------------------------------------------------------------------------------|--------------|---------|-------------|-------|---|
|                                                                                                  | Estimate     | P-value | P-value     | Rank  |   |
| p_Firmicutes; c_Clostridia; o_Clostridiales; f_Lachnospiraceae; g_Lachnospira                    | ↓            | -0.625  | 0.001       | 0.001 | 1 |
| p_Firmicutes; c_Clostridia; o_Clostridiales; f_Christensenellaceae; g_                           | ↓            | -0.630  | 0.002       | 0.003 | 4 |
| p_Firmicutes; c_Clostridia; o_Clostridiales; f_[Tissierellaceae]; g_Finegoldia                   | ↓            | -1.206  | 0.013       | 0.004 | 5 |
| p_Actinobacteria; c_Actinobacteria; o_Bifidobacteriales; f_Bifidobacteriaceae; g_Bifidobacterium | ↓            | -0.226  | 0.124       | 0.056 | 2 |
| p_Firmicutes; c_Clostridia; o_Clostridiales; f_Ruminococcaceae; g_Faecalibacterium               | ↓            | -0.223  | 0.150       | 0.158 | 3 |
| p_Bacteroidetes; c_Bacteroidia; o_Bacteroidales; f_Porphyrimonadaceae; g_Parabacteroides         | ↓            | -0.233  | 0.255       | 0.167 | 7 |
| p_Firmicutes; c_Clostridia; o_Clostridiales; f_Ruminococcaceae; g_                               | ↓            | -0.088  | 0.487       | 0.382 | 8 |
| p_Firmicutes; c_Clostridia; o_Clostridiales; f_Clostridiaceae; g_02d06                           | ↑            | 0.069   | 0.720       | 0.471 | 6 |

Table S6. Results of Beta-Binomial Models for the most important OTUs from random forests (RF) to classify women based on GWG group. Taxonomy indicates the green genes taxonomy. Adjusted p-values account for the following maternal characteristics: maternal age, maternal education, Norwegian ethnicity, maternal smoking, and parity.

| OTU     | Taxonomy                                                                                                         | OW/OB vs Non |         | Adjusted RF |       |    |
|---------|------------------------------------------------------------------------------------------------------------------|--------------|---------|-------------|-------|----|
|         |                                                                                                                  | Estimate     | P-value | P-value     | Rank  |    |
| 4434334 | p_Firmicutes; c_Clostridia; o_Clostridiales; f_Clostridiaceae; g_;                                               | ↓            | -0.464  | 0.006       | 0.007 | 1  |
| 847228  | p_Bacteroidetes; c_Bacteroidia; o_Bacteroidales; f_Porphyrimonadaceae; g_Parabacteroides; s_                     | ↓            | -0.720  | 0.011       | 0.009 | 12 |
| 192015  | p_Firmicutes; c_Clostridia; o_Clostridiales; f_;                                                                 | ↑            | 0.388   | 0.013       | 0.003 | 7  |
| 1096610 | p_Firmicutes; c_Clostridia; o_Clostridiales; f_[Tissierellaceae]; g_Finegoldia; s_                               | ↓            | -1.170  | 0.016       | 0.005 | 9  |
| 2979308 | p_Firmicutes; c_Clostridia; o_Clostridiales; f_Ruminococcaceae; g_Ruminococcus; s_                               | ↓            | -0.600  | 0.022       | 0.015 | 3  |
| 194443  | p_Firmicutes; c_Clostridia; o_Clostridiales; f_Ruminococcaceae; g_;                                              | ↓            | -0.493  | 0.027       | 0.037 | 10 |
| 813479  | p_Actinobacteria; c_Actinobacteria; o_Bifidobacteriales; f_Bifidobacteriaceae; g_Bifidobacterium; s_             | ↓            | -0.468  | 0.030       | 0.023 | 11 |
| 195759  | p_Firmicutes; c_Clostridia; o_Clostridiales; f_Lachnospiraceae; g_;                                              | ↑            | 0.319   | 0.060       | 0.022 | 5  |
| 173876  | p_Firmicutes; c_Clostridia; o_Clostridiales; f_;                                                                 | ↓            | -0.347  | 0.140       | 0.086 | 2  |
| 194686  | p_Firmicutes; c_Clostridia; o_Clostridiales; f_Ruminococcaceae; g_;                                              | ↓            | -0.219  | 0.171       | 0.312 | 6  |
| 194258  | p_Firmicutes; c_Clostridia; o_Clostridiales; f_Ruminococcaceae; g_Faecalibacterium; s_prausnitzii                | ↓            | -0.219  | 0.192       | 0.228 | 8  |
| 4347159 | p_Actinobacteria; c_Actinobacteria; o_Bifidobacteriales; f_Bifidobacteriaceae; g_Bifidobacterium; s_adolescentis | ↓            | -0.174  | 0.238       | 0.211 | 4  |

Table S7. Results of Beta-Binomial Models for the most important genera from random forests (RF) to classify women based on GWG group. Adjusted p-values account for the following maternal characteristics: maternal age, maternal education, Norwegian ethnicity, maternal smoking, and parity.

| Taxonomy                                                                                                    | Excess GWG vs Non | Adjusted |         | RF Rank |   |
|-------------------------------------------------------------------------------------------------------------|-------------------|----------|---------|---------|---|
|                                                                                                             |                   | Estimate | P-value |         |   |
| p_Firmicutes;c_Clostridia;o_Clostridiales;f_[Tissierellaceae];g_WAL_1855D                                   | ↑                 | 1.999    | 0.009   | 0.004   | 3 |
| k_Archaea;p_Euryarchaeota;c_Methanobacteria;o_Methanobacteriales;f_Methanobacteriaceae;g_Methanobrevibacter | ↑                 | 0.556    | 0.058   | 0.071   | 2 |
| p_Bacteroidetes;c_Bacteroidia;o_Bacteroidales;f_[Barnesiellaceae];g_                                        | ↓                 | -0.358   | 0.185   | 0.126   | 4 |
| p_Firmicutes;c_Clostridia;o_Clostridiales;f_Clostridiaceae;g_SMB53                                          | ↑                 | 0.133    | 0.450   | 0.264   | 5 |
| p_Firmicutes;c_Clostridia;o_Clostridiales;f_Ruminococcaceae;g_                                              | ↓                 | -0.008   | 0.948   | 0.927   | 1 |

Table S8. Association between exposure to Maternal OW/OB and 3 measures of infant alpha diversity during the first two years of life, both unadjusted and adjusted for exclusive breastfeeding, mode of delivery at birth, antibiotic exposure, and gestational age at birth. Results are estimates from longitudinal hierarchical linear regression models.

| Exposure               | Infant alpha diversity | Unadjusted |               |         | Adjusted |               |         |
|------------------------|------------------------|------------|---------------|---------|----------|---------------|---------|
|                        |                        | Estimate   | 95% CI        | Pr >  t | Estimate | 95% CI        | Pr >  t |
| Maternal OW/OB         | Observed Species       | 2.05       | (-4.69, 8.78) | 0.55    | 1.89     | (-4.79, 8.58) | 0.58    |
|                        | PD Whole Tree          | 0.15       | (-0.31, 0.61) | 0.52    | 0.15     | (-0.29, 0.59) | 0.49    |
|                        | Shannon                | 0.07       | (-0.07, 0.22) | 0.31    | 0.07     | (-0.07, 0.2)  | 0.31    |
| Maternal Excessive GWG | Observed Species       | 1.05       | (-6.51, 8.6)  | 0.79    | 1.19     | (-6.18, 8.57) | 0.75    |
|                        | PD Whole Tree          | 0.07       | (-0.45, 0.6)  | 0.79    | 0.13     | (-0.37, 0.64) | 0.6     |
|                        | Shannon                | -0.01      | (-0.17, 0.15) | 0.88    | -0.01    | (-0.17, 0.15) | 0.92    |

Table S9. Results of random forest selection process to identify infant gut microbiota taxa associated with exposure to maternal OW/OB, sorted from most to least important according to the Mean Decrease in Accuracy. The out of bag error was 32.9%. For a similar random forest classifying randomly assigned exposure status, the out of bag error was only 21.6% better, indicating that the model failed to identify significant taxonomic differences with exposure.

| OTU_ID  | TAXONOMY                                                                                                                | 0       | 1       | Mean Decrease Accuracy | Mean Decrease Gini |
|---------|-------------------------------------------------------------------------------------------------------------------------|---------|---------|------------------------|--------------------|
| 3723096 | k_Bacteria; p_Firmicutes; c_Bacilli; o_Lactobacillales; f_Streptococcaceae; g_Streptococcus; s_                         | 0.0112  | 0.0076  | 0.0106                 | 22.7806            |
| 284014  | k_Bacteria; p_Proteobacteria; c_Gammaproteobacteria; o_Enterobacteriales; f_Enterobacteriaceae; g_ ; s_                 | 0.0074  | 0.0040  | 0.0067                 | 23.0879            |
| 4425214 | k_Bacteria; p_Firmicutes; c_Bacilli; o_Lactobacillales; f_Streptococcaceae; g_Streptococcus; s_                         | 0.0093  | -0.0042 | 0.0067                 | 26.3048            |
| 289709  | k_Bacteria; p_Proteobacteria; c_Gammaproteobacteria; o_Enterobacteriales; f_Enterobacteriaceae; g_ ; s_                 | 0.0078  | 0.0017  | 0.0067                 | 17.2728            |
| 465079  | k_Bacteria; p_Firmicutes; c_Bacilli; o_Bacillales; f_Planococcaceae; g_ ; s_                                            | 0.0070  | -0.0016 | 0.0054                 | 15.6910            |
| 4481613 | k_Bacteria; p_Actinobacteria; c_Coriobacteriia; o_Coriobacteriales; f_Coriobacteriaceae; g_Collinsella; s_aerofaciens   | 0.0042  | 0.0079  | 0.0049                 | 14.1358            |
| 511908  | k_Bacteria; p_Proteobacteria; c_Gammaproteobacteria; o_Enterobacteriales; f_Enterobacteriaceae; g_Klebsiella; s_        | 0.0029  | 0.0092  | 0.0042                 | 15.6557            |
| 997439  | k_Bacteria; p_Actinobacteria; c_Actinobacteria; o_Bifidobacteriales; f_Bifidobacteriaceae; g_Bifidobacterium; s_        | 0.0039  | 0.0012  | 0.0034                 | 11.3969            |
| 365385  | k_Bacteria; p_Actinobacteria; c_Actinobacteria; o_Bifidobacteriales; f_Bifidobacteriaceae; g_Bifidobacterium; s_bifidum | 0.0038  | 0.0006  | 0.0032                 | 14.7498            |
| 180606  | k_Bacteria; p_Bacteroidetes; c_Bacteroidia; o_Bacteroidales; f_Bacteroidaceae; g_Bacteroides; s_ovatus                  | 0.0033  | 0.0001  | 0.0027                 | 9.9695             |
| 3166216 | k_Bacteria; p_Firmicutes; c_Bacilli; o_Lactobacillales; f_Streptococcaceae; g_Streptococcus; s_                         | 0.0011  | 0.0082  | 0.0025                 | 12.9938            |
| 1733364 | k_Bacteria; p_Bacteroidetes; c_Bacteroidia; o_Bacteroidales; f_Bacteroidaceae; g_Bacteroides; s_uniformis               | 0.0013  | 0.0030  | 0.0016                 | 9.9213             |
| 157748  | k_Bacteria; p_Bacteroidetes; c_Bacteroidia; o_Bacteroidales; f_Bacteroidaceae; g_Bacteroides; s_                        | 0.0013  | 0.0013  | 0.0013                 | 5.2361             |
| 2325032 | k_Bacteria; p_Firmicutes; c_Clostridia; o_Clostridiales; f_Clostridiaceae; g_ ; s_                                      | 0.0002  | 0.0043  | 0.0010                 | 12.5667            |
| 2599028 | k_Bacteria; p_Bacteroidetes; c_Bacteroidia; o_Bacteroidales; f_Bacteroidaceae; g_Bacteroides; s_                        | -0.0004 | 0.0054  | 0.0007                 | 5.7813             |
| 328472  | k_Bacteria; p_Actinobacteria; c_Actinobacteria; o_Actinomycetales; f_Actinomycetaceae; g_Varibaculum; s_                | 0.0000  | 0.0026  | 0.0005                 | 6.6155             |
| 3449122 | k_Bacteria; p_Firmicutes; c_Bacilli; o_Lactobacillales; f_Streptococcaceae; g_Streptococcus; s_                         | -0.0023 | 0.0084  | -0.0002                | 10.3829            |
| 4294457 | k_Bacteria; p_Actinobacteria; c_Actinobacteria; o_Actinomycetales; f_Micrococcaceae; g_Rothia; s_mucilaginoso           | -0.0024 | 0.0070  | -0.0006                | 13.9014            |

Table S10. Results of random forest selection process to identify infant gut microbiota taxa associated with exposure to excessive GWG, sorted from most to least important according to the Mean Decrease in Accuracy. The out of bag error was 36%. For a similar random forest classifying randomly assigned exposure status, the out of bag error was only 8% better, indicating that the model failed to identify significant taxonomic differences with exposure.

| OTU_ID  | TAXONOMY                                                                                                                     |         |         | Mean Decrease | Mean Decrease |
|---------|------------------------------------------------------------------------------------------------------------------------------|---------|---------|---------------|---------------|
|         |                                                                                                                              | 0       | 1       | Accuracy      | Gini          |
| 681370  | k_Bacteria; p_Actinobacteria; c_Actinobacteria; o_Bifidobacteriales; f_Bifidobacteriaceae; g_Bifidobacterium; s_pseudolongum | 0.0166  | 0.0069  | 0.0115        | 17.4474       |
| 4449054 | k_Bacteria; p_Bacteroidetes; c_Bacteroidia; o_Bacteroidales; f_Bacteroidaceae; g_Bacteroides; s_                             | 0.0097  | 0.0030  | 0.0062        | 11.5553       |
| 284014  | k_Bacteria; p_Proteobacteria; c_Gammaproteobacteria; o_Enterobacteriales; f_Enterobacteriaceae; g_ ; s_                      | 0.0071  | 0.0050  | 0.0060        | 22.1594       |
| 510870  | k_Bacteria; p_Proteobacteria; c_Gammaproteobacteria; o_Enterobacteriales; f_Enterobacteriaceae; g_ ; s_                      | 0.0066  | 0.0040  | 0.0052        | 15.5170       |
| 4458700 | k_Bacteria; p_Firmicutes; c_Clostridia; o_Clostridiales; f_Lachnospiraceae; g_[Ruminococcus]; s_                             | 0.0083  | 0.0015  | 0.0047        | 8.3807        |
| 3903651 | k_Bacteria; p_Firmicutes; c_Clostridia; o_Clostridiales; f_Ruminococcaceae; g_Oscillospira; s_                               | 0.0099  | -0.0013 | 0.0040        | 8.8141        |
| 272150  | k_Bacteria; p_Firmicutes; c_Bacilli; o_Lactobacillales; f_Streptococcaceae; g_Streptococcus; s_                              | 0.0001  | 0.0071  | 0.0037        | 21.6168       |
| 4347159 | k_Bacteria; p_Actinobacteria; c_Actinobacteria; o_Bifidobacteriales; f_Bifidobacteriaceae; g_Bifidobacterium; s_adolescentis | 0.0028  | 0.0043  | 0.0035        | 21.9004       |
| 540402  | k_Bacteria; p_Proteobacteria; c_Gammaproteobacteria; o_Enterobacteriales; f_Enterobacteriaceae; g_ ; s_                      | 0.0032  | 0.0031  | 0.0031        | 8.4222        |
| 511908  | k_Bacteria; p_Proteobacteria; c_Gammaproteobacteria; o_Enterobacteriales; f_Enterobacteriaceae; g_Klebsiella; s_             | 0.0052  | 0.0012  | 0.0031        | 8.6857        |
| 109382  | k_Bacteria; p_Proteobacteria; c_Betaproteobacteria; o_Burkholderiales; f_ ; g_ ; s_                                          | 0.0014  | 0.0044  | 0.0030        | 12.7347       |
| 198449  | k_Bacteria; p_Bacteroidetes; c_Bacteroidia; o_Bacteroidales; f_Bacteroidaceae; g_Bacteroides; s_                             | 0.0026  | 0.0031  | 0.0029        | 10.1082       |
| 1061772 | k_Bacteria; p_Firmicutes; c_Bacilli; o_Bacillales; f_Planococcaceae; g_ ; s_                                                 | 0.0003  | 0.0050  | 0.0027        | 12.0601       |
| 2599028 | k_Bacteria; p_Bacteroidetes; c_Bacteroidia; o_Bacteroidales; f_Bacteroidaceae; g_Bacteroides; s_                             | 0.0013  | 0.0040  | 0.0027        | 6.0859        |
| 183089  | k_Bacteria; p_Firmicutes; c_Clostridia; o_Clostridiales; f_Clostridiaceae; g_ ; s_                                           | -0.0002 | 0.0050  | 0.0025        | 10.3876       |
| 941632  | k_Bacteria; p_Actinobacteria; c_Actinobacteria; o_Actinomycetales; f_Corynebacteriaceae; g_Corynebacterium; s_               | 0.0020  | 0.0028  | 0.0024        | 8.6352        |
| 1142029 | k_Bacteria; p_Actinobacteria; c_Actinobacteria; o_Bifidobacteriales; f_Bifidobacteriaceae; g_Bifidobacterium; s_             | 0.0022  | 0.0026  | 0.0024        | 18.7387       |
| 932077  | k_Bacteria; p_Actinobacteria; c_Actinobacteria; o_Actinomycetales; f_Micrococcaceae; g_Rothia; s_mucilaginoso                | 0.0021  | 0.0022  | 0.0022        | 8.0013        |
| 4376828 | k_Bacteria; p_Actinobacteria; c_Actinobacteria; o_Bifidobacteriales; f_Bifidobacteriaceae; g_Bifidobacterium; s_             | 0.0041  | -0.0002 | 0.0018        | 8.9619        |
| 4434334 | k_Bacteria; p_Firmicutes; c_Clostridia; o_Clostridiales; f_Clostridiaceae; g_ ; s_                                           | 0.0013  | 0.0011  | 0.0012        | 11.3705       |
| 518002  | k_Bacteria; p_Proteobacteria; c_Gammaproteobacteria; o_Enterobacteriales; f_Enterobacteriaceae; g_ ; s_                      | 0.0015  | 0.0005  | 0.0010        | 3.8294        |
| 4425214 | k_Bacteria; p_Firmicutes; c_Bacilli; o_Lactobacillales; f_Streptococcaceae; g_Streptococcus; s_                              | 0.0016  | -0.0011 | 0.0002        | 21.3768       |

Supplemental Figures

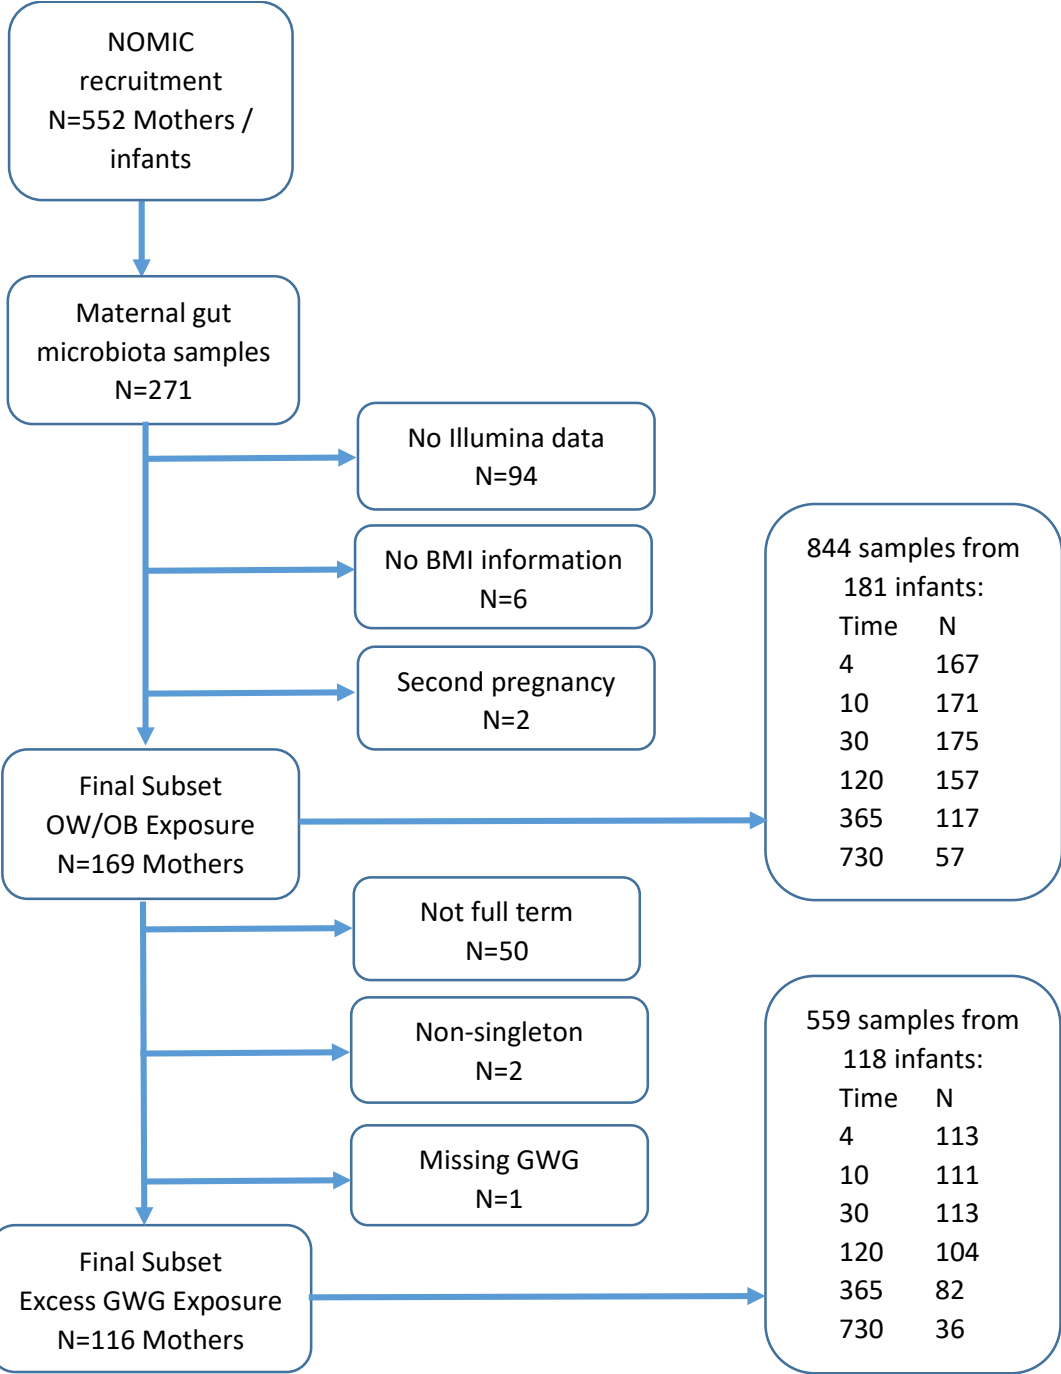

Figure S3. Flow chart for the samples from the NoMIC cohort included in this study.



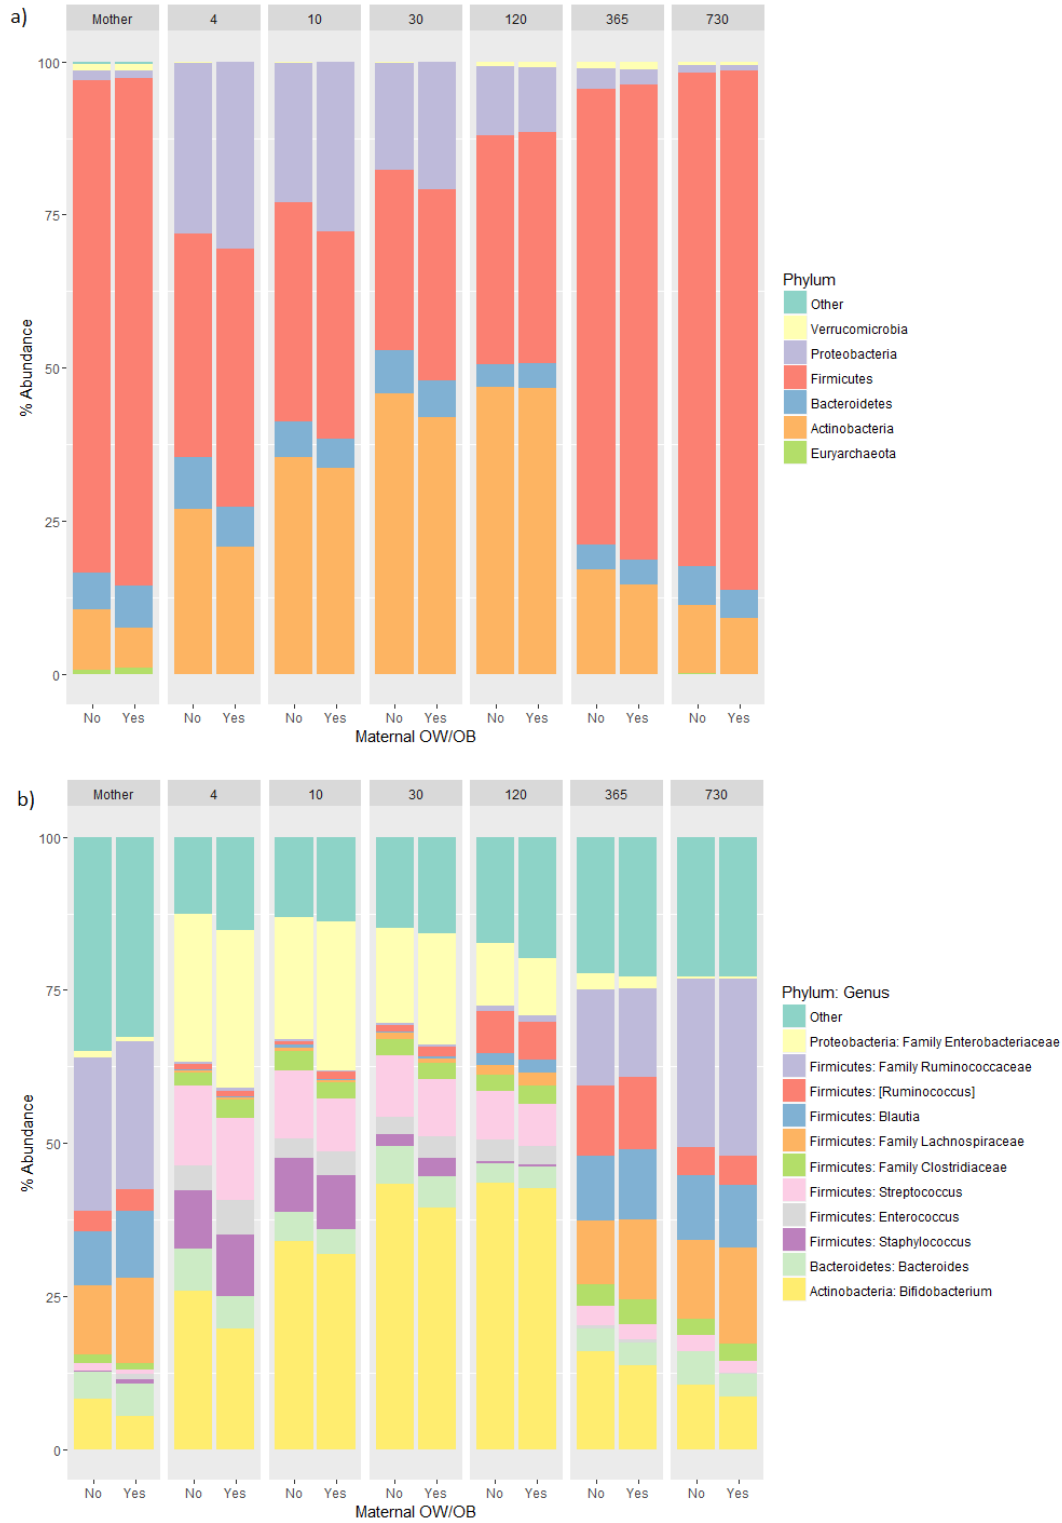

Figure S4. Most abundant a) phylum and b) genus level taxa in maternal samples at the time of delivery and infant samples at days 4, 10, 30, 120, 365, and 730 post-birth by maternal pre-pregnancy overweight / obese (OW/OB) status.

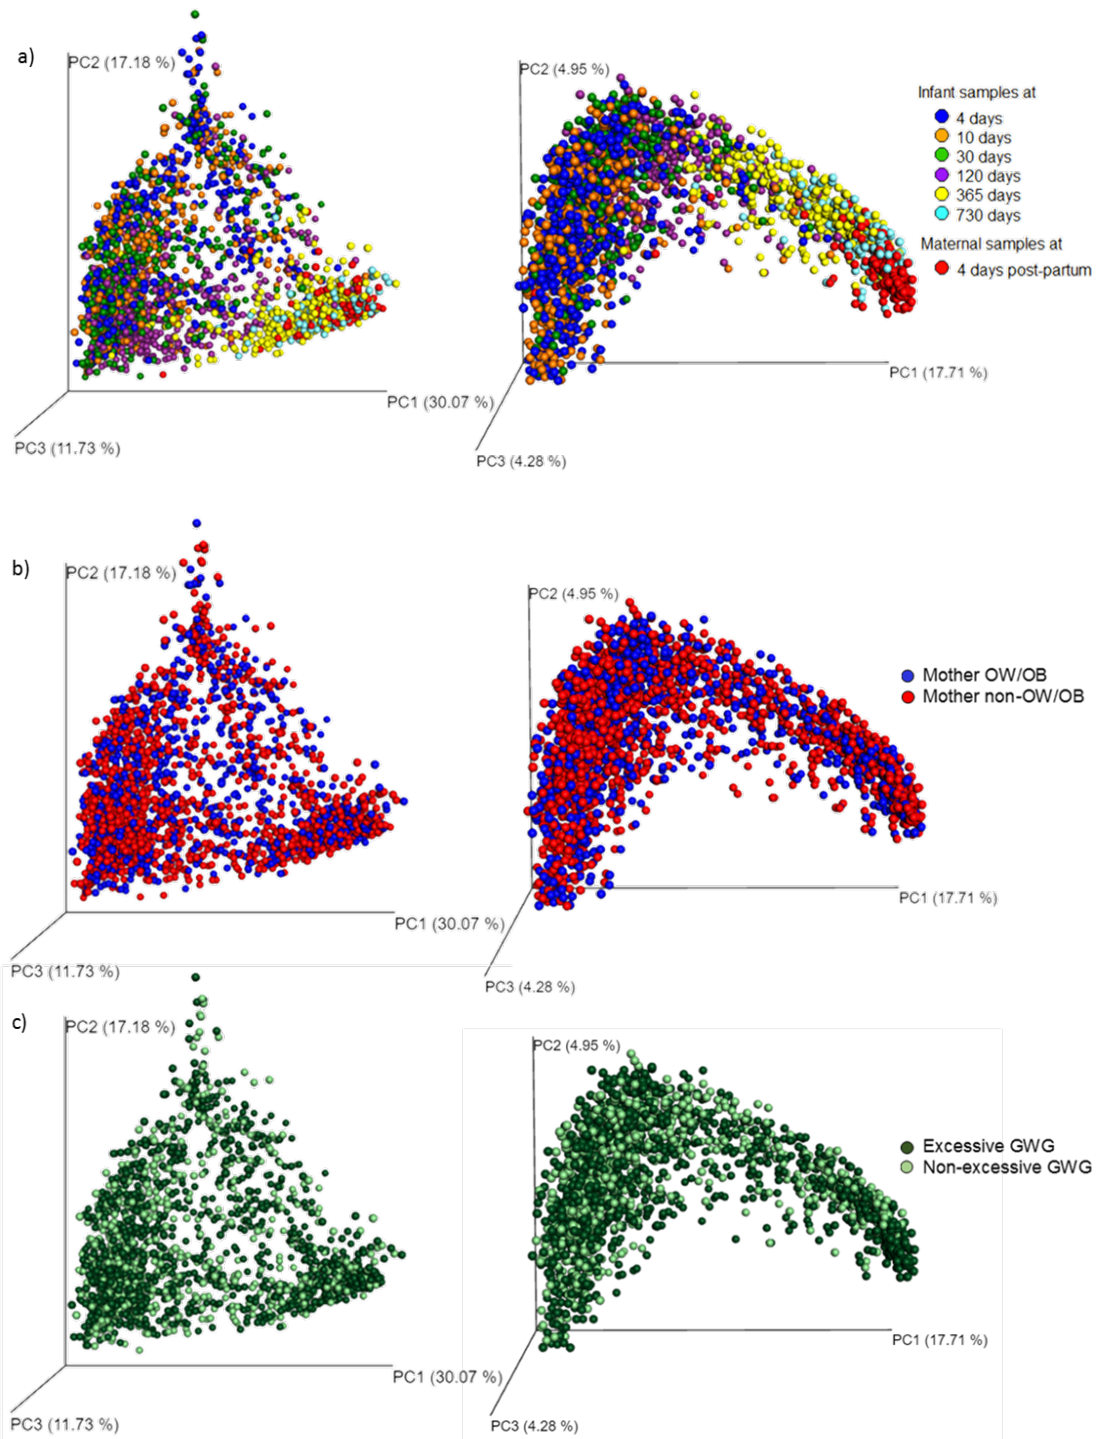

Figure S5. Principal coordinate analysis plots of weighted (left) and unweighted (right) UniFrac distance of maternal gut microbiota samples 4 days post-partum and infant gut samples at days 4, 10, 30, 120, 365, and 730 post-birth by a) sampling time, b) maternal overweight / obesity (OW/OB) and c) maternal excessive gestational weight gain (GWG).
